# Supplementary material for: Split northern westerlies during the Little Ice Age
Source: Research Square preprint supplement (doi:10.21203/rs.3.rs-1348259/v1), 2022-03-18
Supplement: Supplementary file 1 [file 228d86a8a48f941f96e38a32.xlsx]

## Sheet: 工作表1
Data of BA18-4
Depth (mm)	Age (yr BP)	Error (2s)	Error +	Error -	Mg/Ca (mmol/mol)	Sr/Ca (mmol/mol)	Ba/Ca (μmol/mol)
0	4.84747	19.0725	17.8241	-20.3208	30.4781	0.051767	7.32824
0.2	7.807	17.7394	19.8087	-15.6701	33.0908	0.0477967	7.30494
0.4	10.7581	16.3635	21.7405	-10.9865	30.3887	0.0469026	7.06219
0.6	13.7042	14.9776	23.6651	-6.29015	27.2739	0.0450365	6.58465
0.8	16.6488	13.6144	25.628	-1.60093	27.0358	0.0419132	6.91569
1	19.5953	12.3067	27.6747	3.06118	23.0329	0.0490902	6.48769
1.14286	21.7031	11.4248	29.2131	6.3636	19.24	0.0486707	6.62958
1.28571	23.8149	10.5997	30.8341	9.63473	20.272	0.0467444	6.41842
1.42857	25.932	9.84351	32.5543	12.8673	29.6515	0.0441321	7.4274
1.57143	28.0557	9.16812	34.3903	16.054	25.8343	0.0403718	6.29902
1.71429	30.1872	8.58545	36.3585	19.1876	23.7401	0.0457742	5.39561
1.85714	32.3278	8.10744	38.4757	22.2609	24.0036	0.0474738	6.11518
2	34.4787	7.74603	40.7585	25.2664	22.1423	0.0489557	5.70497
2.25	38.2679	7.40575	45.1612	30.3497	22.6371	0.048746	6.48999
2.5	42.0778	7.37765	49.9692	35.2139	23.8713	0.0496241	7.12776
2.75	45.8935	7.58029	55.0303	39.8697	25.7194	0.0535553	7.68353
3	49.7002	7.93224	60.1919	44.3274	27.5574	0.0500891	6.76056
3.16667	52.2256	8.20961	63.6136	47.1944	26.9088	0.0491603	6.96797
3.33333	54.736	8.49302	66.9671	49.9811	25.5773	0.0469713	6.59841
3.5	57.2269	8.75834	70.2073	52.6907	24.08	0.042099	5.56263
3.66667	59.6939	8.98145	73.2891	55.3262	22.3897	0.0433803	5.28564
3.83333	62.1327	9.13822	76.1673	57.8909	21.3473	0.0434805	5.2362
4	64.5388	9.20452	78.7967	60.3877	20.8846	0.0446826	5.35754
4.16667	66.9063	9.16315	81.1432	62.8169	20.8057	0.0426738	5.32242
4.33333	69.223	9.02456	83.2159	65.1668	20.7329	0.0438549	5.66026
4.5	71.4754	8.80617	85.0352	67.4229	20.8312	0.0422475	5.70686
4.66667	73.6499	8.52535	86.6213	69.5706	21.1225	0.0393908	5.70408
4.83333	75.7327	8.1995	87.9944	71.5954	21.6351	0.0413278	6.66549
5	77.7102	7.84601	89.1747	73.4827	21.3866	0.0446378	5.55723
5.16667	79.5688	7.48227	90.1825	75.218	21.4803	0.0447051	5.90501
5.33333	81.295	7.12567	91.038	76.7866	21.0312	0.0456635	6.10693
5.5	82.8749	6.79361	91.7613	78.1741	21.3622	0.0431061	5.99534
5.66667	84.295	6.50347	92.3728	79.3659	21.4175	0.0400365	5.62692
5.83333	85.5417	6.27265	92.8927	80.3474	20.9961	0.0464455	5.75622
6	86.6013	6.11854	93.3411	81.104	19.9057	0.0460718	5.74919
6.16667	87.471	6.05425	93.7422	81.6337	20.2254	0.0467684
6.33333	88.1911	6.07579	94.1353	81.9837	20.7937	0.0488031	6.6055
6.5	88.8125	6.17488	94.5637	82.2139	21.1359	0.0464942	6.36084
6.66667	89.3864	6.34325	95.0707	82.3841	21.2739	0.0489035	6.34474
6.83333	89.9639	6.57264	95.6994	82.5541	21.0089	0.0496634	6.48307
7	90.596	6.85476	96.4931	82.7836	20.8999	0.0510521	6.67615
7.33	92.2084	7.53657	98.7208	83.6477	21.0741	0.0473949	6.50701
7.66	94.6315	8.32848	102.101	85.4437	21.2425	0.0476908	6.5248
8	98.3946	9.19172	107.143	88.7592	21.04	0.0477651
8.125	100.178	9.50794	109.458	90.4421	20.8269	0.0460319	6.21809
8.25	102.167	9.82097	112.006	92.3636	21.1149	0.0444439	5.83769
8.375	104.335	10.1305	114.754	94.4934	20.3279	0.0465868	6.14375
8.5	106.655	10.4364	117.674	96.8011	22.0993	0.0439465	5.75864
8.625	109.1	10.7382	120.733	99.2564	20.4865	0.0497254	6.83033
8.75	111.645	11.0357	123.9	101.829	20.5599	0.0457594	5.97862
8.875	114.263	11.3286	127.146	104.488	20.5736	0.0461992	6.06265
9	116.927	11.6167	130.438	107.205	21.314	0.0447471	5.80859
9.2	121.22	12.0668	135.726	111.592	21.7774	0.0437883	5.58667
9.4	125.454	12.5026	140.928	115.923	22.4807	0.0446711	5.46123
9.6	129.522	12.923	145.919	120.073	24.3377	0.0412259	4.89614
9.8	133.315	13.3268	150.571	123.917	23.6409	0.04146	5.12428
10	136.724	13.713	154.758	127.332	25.1326	0.0375826	4.35942
10.1667	139.209	14.0207	157.818	129.776	24.7149	0.0383231	4.48361
10.3333	141.379	14.3165	160.497	131.864	25.3436	0.0403398	4.40335
10.5	143.264	14.6015	162.828	133.625	24.3889	0.0374397	4.45546
10.6667	144.891	14.8769	164.839	135.086	24.6132	0.0382397	4.4368
10.8333	146.288	15.1438	166.563	136.275	24.0265	0.0389139	4.43506
11	147.483	15.4034	168.029	137.222	23.4673	0.0398701	4.62322
11.1429	148.368	15.621	169.104	137.862	22.7727	0.045003	4.73597
11.2857	149.142	15.8347	170.032	138.363	22.7393	0.041072	4.71183
11.4286	149.824	16.0454	170.832	138.742	22.7525	0.0403371	4.71756
11.5714	150.431	16.2537	171.524	139.016	21.7962	0.0386964	4.57741
11.7143	150.98	16.4604	172.126	139.205	22.3162	0.0385948	4.66152
11.8571	151.489	16.6662	172.658	139.326	22.4692	0.0385773	4.51138
12	151.976	16.8719	173.14	139.396	21.9956	0.0387403	4.58744
12.1429	152.456	17.0774	173.587	139.432	21.9684	0.0377789	4.63073
12.2857	152.932	17.2825	174.006	139.441	22.264	0.0371778	4.5543
12.4286	153.406	17.4786	174.398	139.441	21.9308	0.036753	4.61286
12.5714	153.879	17.6626	174.766	139.441	22.3032	0.0393726	4.61408
12.7143	154.352	17.8358	175.112	139.441	22.6248	0.0348554	4.21684
12.8571	154.828	17.9965	175.439	139.446	21.847	0.0391051	4.65859
13	155.306	18.1352	175.75	139.479	22.4674	0.0363315	4.27292
13.1667	155.869	18.2681	176.094	139.557	22.3659	0.0354228	4.37738
13.3333	156.439	18.3646	176.422	139.692	22.3126	0.0390718	4.45854
13.5	157.019	18.4195	176.738	139.899	22.1355	0.0380983	4.58706
13.6667	157.611	18.4275	177.046	140.191	22.6038	0.0376893	4.57543
13.8333	158.216	18.3832	177.349	140.583	22.6501	0.0379791	4.55255
14	158.837	18.2814	177.653	141.09	22.8904	0.0379487	4.59093
14.1667	159.482	18.1206	177.966	141.725	23.4967	0.0395533	4.55588
14.3333	160.187	17.9141	178.33	142.501	23.8587	0.0392725	4.48065
14.5	160.992	17.6793	178.789	143.431	23.3089	0.037649	4.48717
14.6667	161.939	17.4333	179.392	144.525	22.7399	0.0386358	4.57689
14.8333	163.071	17.1934	180.183	145.796	22.5058	0.0385216	4.63201
15	164.428	16.9768	181.21	147.257	22.4135	0.0406445	4.79519
15.2	166.414	16.7718	182.819	149.276	23.8425	0.0432042	5.11818
15.4	168.857	16.6548	184.915	151.606	22.9699	0.0412513	4.99251
15.6	171.828	16.6558	187.578	154.266	23.6124	0.0430604	5.07137
15.8	175.4	16.8043	190.888	157.279	22.2607	0.0404734	4.78399
16	179.645	17.1302	194.925	160.665	22.9071	0.0376469	4.88661
16.1429	183.119	17.4831	198.286	163.32	22.5248	0.036104	4.77899
16.2857	186.938	17.9229	202.017	166.171	22.0278	0.0365558	5.04332
16.4286	191.067	18.4308	206.072	169.21	22.5098	0.0353157	4.77535
16.5714	195.473	18.9882	210.408	172.432	23.0921	0.0407648	4.97056
16.7143	200.119	19.5761	214.983	175.831	22.2888	0.0378478	4.90463
16.8571	204.971	20.176	219.753	179.401	21.537	0.0386268	5.02788
17	209.994	20.7689	224.673	183.135	21.3819	0.0433583	5.69864
17.25	219.093	21.7336	233.517	190.05	21.4499	0.0419875	5.71528
17.5	228.424	22.5192	242.456	197.418	21.2554	0.0437208	5.55631
17.75	237.8	23.0252	251.259	205.209	20.8472	0.041604	5.41756
18	247.036	23.151	259.692	213.39	20.8345	0.0407743	5.47905
18.125	251.548	23.0456	263.706	217.615	20.4522	0.0400788	5.76717
18.25	255.985	22.8421	267.601	221.917	22.3859	0.0444463	6.36654
18.375	260.353	22.5623	271.407	226.283	20.3949	0.0413869	5.04736
18.5	264.66	22.2282	275.157	230.7	20.2148	0.0450119	5.6405
18.625	268.912	21.8617	278.879	235.156	21.1707	0.0454176	5.82876
18.75	273.115	21.4849	282.607	239.638	20.8535	0.0457363	5.84296
18.875	277.277	21.1196	286.372	244.132	21.1836	0.0461923	5.95151
19	281.404	20.7878	290.203	248.628	20.8704	0.0465301	5.85414
19.1667	286.864	20.4356	295.471	254.6	20.831	0.0430675	5.46694
19.3333	292.29	20.2341	300.987	260.519	20.0497	0.0437599	5.55466
19.5	297.697	20.2353	306.827	266.357	20.8742	0.0425776	5.47326
19.6667	303.102	20.4913	313.064	272.081	20.4362	0.0415374	5.5585
19.8333	308.52	21.0541	319.771	277.663	19.0847	0.0481348	5.77148
20	313.968	21.9758	327.024	283.072	21.1642	0.0496485	6.30558
20.2	320.561	23.5906	336.497	289.316	20.1624	0.0485403	6.36909
20.4	327.222	25.6576	346.675	295.36	20.81	0.0494032	6.55631
20.6	333.955	28.0371	357.372	301.298	19.9072	0.0528387	5.94774
20.8	340.761	30.5897	368.402	307.222	20.4135	0.0462753	5.84741
21	347.645	33.1757	379.577	313.226	20.253	0.0441574	5.64266
21.25	356.362	36.2425	393.469	320.984	20.9493	0.0456529	5.9331
21.5	365.211	38.8709	406.934	329.193	20.9696	0.0416585	5.24817
21.75	374.197	40.7882	419.611	338.034	21.0296	0.0400131	4.99406
22	383.326	41.7218	431.134	347.691	22.3063	0.0396002	4.65964
22.2	390.732	41.6201	439.328	356.088	23.5581	0.0365937	4.53894
22.4	398.206	40.8328	446.663	364.997	23.9921	0.059578	4.83528
22.6	405.723	39.4781	453.251	374.295	24.9514	0.0427116	4.45758
22.8	413.255	37.6742	459.205	383.856	24.9873	0.035735	4.53451
23	420.777	35.5395	464.635	393.556	25.5045	0.0382729	4.47988
23.1667	427.016	33.5933	468.841	401.655	26.347	0.0379493	4.46417
23.3333	433.215	31.568	472.827	409.691	26.0924	0.0399728	5.20839
23.5	439.356	29.5321	476.657	417.593	27.9938	0.042854	5.51816
23.6667	445.425	27.554	480.395	425.287	26.134	0.0408896	5.55511
23.8333	451.406	25.7022	484.107	432.703	25.6027	0.0486181	6.23615
24	457.283	24.0452	487.857	439.767	25.8314	0.0484458	6.81016
24.2	464.182	22.3832	492.476	447.709	27.2595	0.051163	7.44062
24.4	470.905	21.0564	497.214	455.101	27.3898	0.0507388	7.354
24.6	477.448	20.0209	502.043	462.001	27.2393	0.0522631	7.63231
24.8	483.806	19.2327	506.934	468.469	26.7685	0.0547831	7.96101
25	489.975	18.6479	511.859	474.563	22.957	0.051859	7.39796
25.1429	494.262	18.3304	515.381	478.72	25.045	0.0505153	6.56637
25.2857	498.448	18.0782	518.895	482.739	24.9586	0.0500976	6.53005
25.4286	502.532	17.8755	522.391	486.64	23.9459	0.052948	6.79629
25.5714	506.512	17.706	525.857	490.445	23.9101	0.0518803	6.988
25.7143	510.386	17.554	529.284	494.176	23.3063	0.0505426	7.07145
25.8571	514.153	17.4033	532.661	497.855	23.3407	0.0506269	7.29673
26	517.81	17.238	535.978	501.502	24.0458	0.0493392	7.27767
26.1111	520.579	17.0907	538.511	504.329	25.286	0.0495463	6.96282
26.2222	523.286	16.9273	541.004	507.149	24.4764	0.0519069	7.03018
26.3333	525.935	16.7503	543.46	509.96	25.5976	0.0489729	6.92762
26.4444	528.533	16.5622	545.884	512.76	25.4487	0.0485593	7.03031
26.5556	531.085	16.3654	548.279	515.548	24.6371	0.0494796	6.98471
26.6667	533.595	16.1625	550.647	518.322	25.5452	0.0482894	6.82818
26.7778	536.068	15.9558	552.992	521.08	26.4934	0.0487571	6.51478
26.8889	538.51	15.7478	555.317	523.821	26.3988	0.0475276	6.43814
27	540.926	15.5411	557.626	526.544	27.1035	0.045353	5.85638
27.1667	544.511	15.2386	561.067	530.589	27.1351	0.0534093	5.86437
27.3333	548.066	14.9528	564.489	534.583	27.2447	0.0426105	5.58693
27.5	551.608	14.692	567.905	538.521	29.3807	0.0439568	5.64201
27.6667	555.154	14.4644	571.325	542.396	28.3046	0.0454806	6.63041
27.8333	558.721	14.2785	574.761	546.204	28.9228	0.0425775	5.63446
28	562.327	14.1425	578.223	549.938	28.5461	0.0419348	5.16337
28.25	567.833	14.0451	583.487	555.396	27.7001	0.0420716	5.44943
28.5	573.444	14.075	588.84	560.69	25.9877	0.0438453	5.65444
28.75	579.141	14.2283	594.29	565.833	26.1247	0.0433497	5.67399
29	584.904	14.5013	599.84	570.837	25.2399	0.0433604	6.17285
29.2	589.548	14.8033	604.355	574.749	24.4607	0.0425681	5.92943
29.4	594.211	15.1774	608.941	578.586	25.8041	0.043976	5.91972
29.6	598.883	15.6217	613.599	582.355	29.29	0.0520389	6.82595
29.8	603.554	16.1341	618.332	586.063	37.8951	0.067019	8.89857
30	608.212	16.7129	623.142	589.717
30.25	614.009	17.5236	629.265	594.217
30.5	619.786	18.4146	635.494	598.665
30.75	625.556	19.3653	641.813	603.082	28.2298	0.0452137	5.31973
31	631.332	20.3555	648.203	607.492	26.0671	0.04099	5.15974
31.1429	634.641	20.9313	651.88	610.018	25.9426	0.0399224	5.0234
31.2857	637.96	21.5095	655.571	612.552	26.7375	0.039934	5.00913
31.4286	641.29	22.0865	659.273	615.1	26.2955	0.0406584	5.20784
31.5714	644.634	22.6583	662.983	617.666	26.2345	0.0408977	5.1028
31.7143	647.995	23.2213	666.696	620.254	27.7489	0.0408477	5.18752
31.8571	651.376	23.7716	670.411	622.868	27.3654	0.0406685	5.30377
32	654.778	24.3055	674.123	625.512	29.5996	0.0422446	6.03762
32.1429	658.204	24.8193	677.83	628.191	30.031	0.0454214	6.99887
32.2857	661.653	25.3108	681.533	630.912	28.7166	0.0432769	5.82901
32.4286	665.123	25.7778	685.235	633.679	30.2424	0.0455599	6.60705
32.5714	668.611	26.2181	688.936	636.5	29.997	0.0453969	6.42196
32.7143	672.117	26.6297	692.639	639.38	31.0932	0.0457122	7.26052
32.8571	675.639	27.0104	696.347	642.326	30.8669	0.0431698	6.73468
33	679.174	27.358	700.059	645.344	30.396	0.0467391	7.10668
33.1667	683.313	27.7189	704.401	648.963	30.0907	0.047722	7.33907
33.3333	687.465	28.0285	708.756	652.699	29.7446	0.0467763	7.21392
33.5	691.628	28.2836	713.128	656.561	30.1042	0.0465115	7.13453
33.6667	695.798	28.4805	717.52	660.559	30.0577	0.0451176	6.64306
33.8333	699.973	28.6161	721.935	664.703	30.074	0.0484557	6.74745
34	704.15	28.6868	726.375	669.002	30.3699	0.0472747	6.62933
34.2	709.161	28.6865	731.74	674.367	30.0074	0.0460316	6.44706
34.4	714.167	28.613	737.141	679.915	29.652	0.0456135	6.30405
34.6	719.166	28.4913	742.572	685.589	29.6908	0.0449369	6.3109
34.8	724.155	28.3463	748.026	691.333	29.5897	0.0468698	6.20768
35	729.13	28.2032	753.498	697.092	29.5765	0.0446786	5.90419
35.2	734.088	28.0868	758.982	702.808	29.8749	0.0456311	6.21747
35.4	739.027	28.0223	764.471	708.426	30.3584	0.0464702	6.78946
35.6	743.944	28.0345	769.96	713.891	30.5895	0.0466249	7.11999
35.8	748.836	28.1486	775.442	719.145	32.4042	0.0517626	8.06489
36	753.699	28.3894	780.913	724.134	34.9426	0.057426	9.52949
36.2	758.531	28.7747	786.366	728.817	35.4994	0.0589333	9.89141
36.4	763.336	29.2927	791.805	733.22	35.3638	0.0607531	10.2052
36.6	768.116	29.9246	797.234	737.385	34.5663	0.0630744	10.4703
36.8	772.875	30.6512	802.657	741.354	34.8679	0.0679995	11.1771
37	777.616	31.4536	808.077	745.17	30.9132	0.0702005	11.6779
37.25	783.523	32.5341	814.856	749.788	35.4001	0.0717537	11.9242
37.5	789.413	33.6663	821.645	754.313	36.5163	0.0690231	11.6361
37.75	795.294	34.8128	828.454	758.828	37.6847	0.066174	11.2824
38	801.172	35.9367	835.288	763.415	39.1731	0.0639904	10.675
38.2	805.876	36.7984	840.779	767.183	39.5888	0.0801036	11.2992
38.4	810.583	37.6263	846.289	771.036	41.3168	0.0658972	11.3791
38.6	815.29	38.4247	851.812	774.963	41.3512	0.0630998	10.9662
38.8	819.998	39.1983	857.347	778.95	43.1845	0.0636044	11.4074
39	824.706	39.9514	862.888	782.985	45.1066	0.0674531	11.9696
39.1667	828.629	40.5665	867.508	786.375	45.6509	0.0687918	12.1627
39.3333	832.552	41.173	872.128	789.782	40.655	0.0682283	11.6538
39.5	836.474	41.7735	876.745	793.198	45.1212	0.0671466	12.1108
39.6667	840.394	42.3706	881.358	796.617	45.469	0.0702206	12.1495
39.8333	844.313	42.9669	885.964	800.031	43.4499	0.0667579	11.2591
40	848.23	43.5648	890.561	803.432	43.9122	0.0652019	11.393
40.1667	852.145	44.1667	895.148	806.814	42.1879	0.0719092	12.0606
40.3333	856.058	44.773	899.725	810.178	43.428	0.0665036	11.4803
40.5	859.971	45.384	904.293	813.525	42.1422	0.0718236	12.0534
40.6667	863.884	45.9998	908.854	816.855	44.8835	0.0727735	12.0937
40.8333	867.798	46.6206	913.41	820.169	43.5159	0.0707556	11.992
41	871.714	47.2465	917.962	823.469	37.8069	0.0680524	10.9545
